# Supplementary material for: Impact of positive surgical margins on biochemical recurrence and metastases after radical prostatectomy: 5-year follow-up of a nationwide real-world cohort
Source: Research Square preprint supplement (doi:10.21203/rs.3.rs-6930249/v1), 2025-07-01
Supplement: Supplementary file 1 [file dac7dead51c6b5224b8afa7f.docx]

**Supplementary Figure 1: ROC-curve to determine a relevant cutoff for PSM length**

**
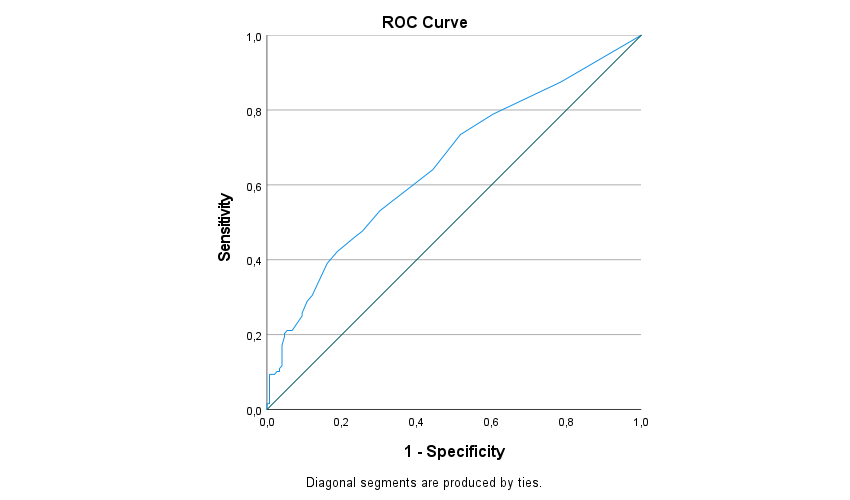
**

Area under the curve: 0.653
