# Supplementary material for: Impact of positive surgical margins on biochemical recurrence and metastases after radical prostatectomy: 5-year follow-up of a nationwide real-world cohort
Source: Research Square preprint supplement (doi:10.21203/rs.3.rs-6930249/v1), 2025-07-01
Supplement: Supplementary file 2 [file dc29f86bfbc8d956b80e875b.docx]

**Supplementary Table 1: Univariable Cox regression analysis of patient, tumour and surgical margin characteristics to identify prognostic factors associated with BCR risk**

| **Characteristic** | **Hazard ratio (95% CI)** | ***p* value** |
| --- | --- | --- |
| Age (years) | 1.00 (0.99-1.03) | 0.502 |
| Body Mass Index (kg/m2; N = 818) | 0.98 (0.95-1.02) | 0.340 |
| Charlson Comorbidity Index  0 (*N* = 670)  1 (*N* = 233)  ≥2 (*N* = 58) | Ref.  1.17 (0.90-1.52)  1.41 (0.92-2.17) | 0.192  0.236  0.119 |
| Total PSA at diagnosis (ng/mL; N = 993) | 1.03 (1.02-1.04) | <.001 |
| Pathological T stage  T2 (*N* = 679)  T3a (*N* = 230)  T3b-4 (*N* = 89) | Ref.  1.96 (1.52-2.52)  4.14 (3.07-5.57) | <.001  <.001  <.001 |
| ISUP grade group at RP  1 (*N* = 239)  2 (*N* = 453)  3 (*N* = 178)  4 (*N* = 73)  5 (*N* = 52) | Ref.  1.59 (1.10-2.29)  3.86 (2.64-5.64)  4.93 (3.19-7.63)  8.09 (5.17-12.63) | <.001  0.014  <.001  <.001  <.001 |
| **Surgical margin status** | | |
| Negative (*N* = 687)  Positive (*N* = 311) | Ref.  2.11 (1.69-2.64) | <.001 |
| Negative (*N* = 687)  Positive  < 3 mm (*N* = 86)  ≥ 3 mm (*N* = 190) | Ref.  1.23 (0.82-1.85)  2.72 (2.12-3.47) | 0.316  <.001 |
| Positive  < 3 mm (*N* = 86)  ≥ 3 mm (*N* = 190) | Ref.  2.16 (1.41-3.31) | <.001 |

CI = confidence interval, Ref. = reference, PSA = prostate-specific antigen, T = tumour, ISUP = International Society of Urological Pathology, RP = radical prostatectomy
